# Supplementary material for: Functionalized graphene oxide–antibody conjugate-based electrochemical immunosensors to detect Opisthorchis viverrini antigen in urine
Source: Royal Society of Chemistry journal article supplement (doi:10.1039/d3ma01075a), 2024-01-01
Supplement: d3ma01075a1.pdf [file d3ma01075a1.pdf]

## Supplementary materials

### Functionalized graphene oxide-antibody conjugate-based electrochemical immunosensor to detect *Opisthorchis viverrini* antigen in urine

Nang Noon Shean Aye<sup>1,2</sup>, Pornsuda Maraming<sup>2</sup>, Patcharaporn Tippayawat<sup>2</sup>, Sakda Daduang<sup>3</sup>, Anchalee Techasen<sup>2,4</sup>, Wassana Jamnongkan<sup>4</sup>, Paiboon Sithithaworn<sup>4,5</sup>, Jureerut Daduang<sup>2\*</sup>

<sup>1</sup> Biomedical Sciences Program, Graduate School, Khon Kaen University, Khon Kaen 40002, Thailand; [nangnoonshean.aye@kkumail.com](mailto:nangnoonshean.aye@kkumail.com)

<sup>2</sup> Centre for Research and Development of Medical Diagnostic Laboratories, Faculty of Associated Medical Sciences, Khon Kaen University, Khon Kaen 40002, Thailand; [pornsma@kku.ac.th](mailto:pornsma@kku.ac.th) (PM), [patchatip@kku.ac.th](mailto:patchatip@kku.ac.th) (PT), [jurpoo@kku.ac.th](mailto:jurpoo@kku.ac.th) (JD)

<sup>3</sup> Division of Pharmacognosy and Toxicology, Faculty of Pharmaceutical Sciences, Khon Kaen University, Khon Kaen 40002, Thailand; [sakdad@kku.ac.th](mailto:sakdad@kku.ac.th)

<sup>4</sup> Cholangiocarcinoma Research Institute, Khon Kaen University, Khon Kaen 40002, Thailand; [anchte@kku.ac.th](mailto:anchte@kku.ac.th), [wassana\\_jk@hotmail.co.th](mailto:wassana_jk@hotmail.co.th)

<sup>5</sup> Department of Parasitology, Faculty of Medicine, Khon Kaen University, Khon Kaen 40002, Thailand; [paib\\_sit@kku.ac.th](mailto:paib_sit@kku.ac.th)

Correspondence\*: [jurpoo@kku.ac.th](mailto:jurpoo@kku.ac.th)

#### Indirect ELISA measurement

Monoclonal OV antibody (mAb, IgM, Kku 505) 100 µL was coated on 96-well microtiter plates and incubated overnight at 4°C followed by washing with PBST. The plates were blocked with 200 µL of 5% skimmed milk solution and incubated at 37°C for 1 hr. The plates were then washed for 5 times with PBST. Urine samples were centrifuged at 1500 rpm for 5 min at 4°C. The centrifuged urine sample (100 µl/well) was added into the plates and incubated at 37°C for 2 hr. The second polyclonal anti-rabbit IgG antibody (100 µl) was added and incubated at 37°C for 1 hr. The plates were washed 3 times with PBST between each immobilization steps. Biotin conjugate (100 µl/well) was incubated at 37°C for 1 hr. Then, streptavidin horseradish peroxidase (HRP) conjugate (100 µl/well) was added. After 30 min incubation, the plates were washed again with PBST. The substrate Orthophenylenediamine hydrochloride was added to wells and incubated for 20 min at room temperature. The reaction was stopped by the addition of 2M sulfuric acid (H<sub>2</sub>SO<sub>4</sub>) and the absorbance was measured at 492 nm.

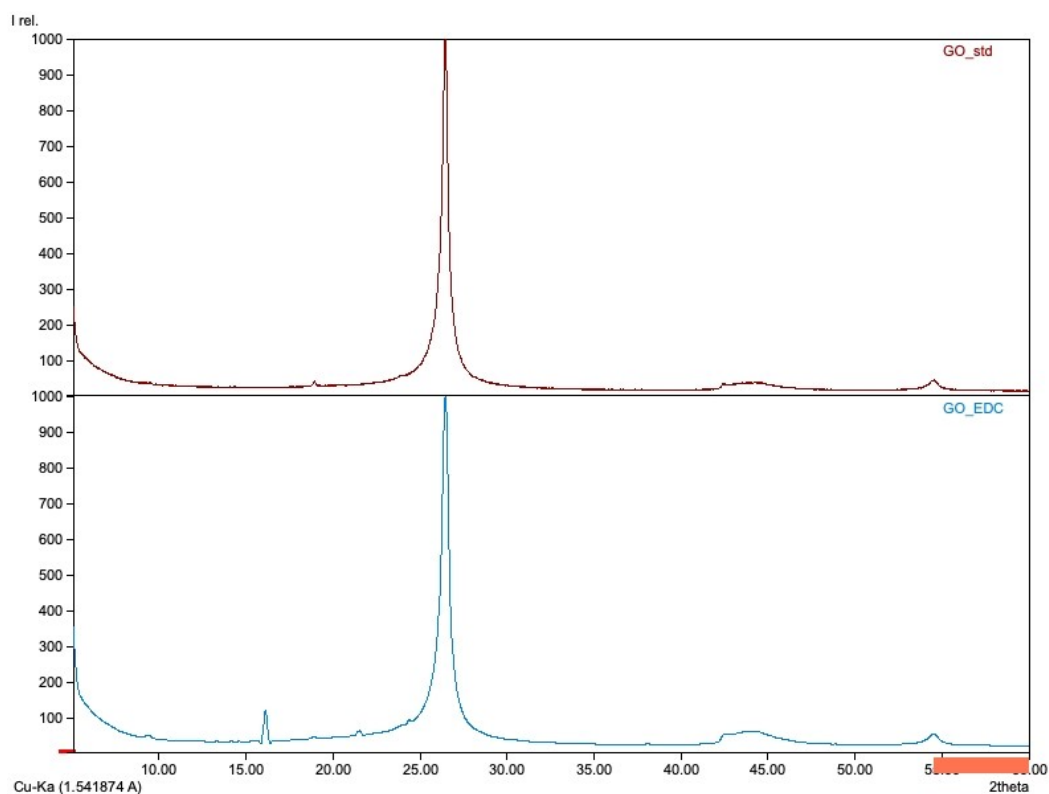

Figure S1 XRD patterns of original GO and EDC/NHS functionalized GO

Table S1. OV positive percentage based on age and gender by sensor detection

| Sample  | Method            | Sex                            | Age                              | Mean<br>± SD | Interval of Age |          |           |           |           |
|---------|-------------------|--------------------------------|----------------------------------|--------------|-----------------|----------|-----------|-----------|-----------|
|         |                   | Male<br>(OV<br>positive,<br>%) | Female<br>(OV<br>positive,<br>%) |              | < 30            | 31-40    | 41-50     | 51-60     | >60       |
| Group 1 |                   | 50                             | 97                               | 50.56 ±      | 7               | 7        | 30        | 44        | 59        |
|         | Sensor            | (38,76)                        | (70,72)                          | 18.69        | (7,100)         | (3,42.8) | (23,76.3) | (30,68.2) | (45,76.3) |
|         | ELISA             | (36,72)                        | (62,63.9)                        |              | (7,100)         | (3,42.8) | (23,76.3) | (31,70.5) | (46,78.0) |
| Group 2 |                   | 39                             | 91                               | 50.40 ±      | 10              | 13       | 29        | 46        | 32        |
|         | Sensor            | (18,46.2)                      | (36,39.6)                        | 16.97        | (3,30)          | (5,38.5) | (14,48.3) | (22,47.8) | (10,31.2) |
|         | OV-RDt            | (15,38.5)                      | (35,38.5)                        |              | (3,30)          | (6,46.2) | (14,48.3) | (18,39.1) | (9,28.1)  |
| Group 3 |                   | 68                             | 170                              | 42.9 ±       | 70              | 11       | 50        | 77        | 45        |
|         | Sensor            | (25,37.3)                      | (54,32.1)                        | 19.83        | (9,12.9)        | (4,36.4) | (19,38)   | (23,29.9) | (24,53.3) |
|         | ELISA &<br>OV-RDT | (17,25)                        | (38,22.4)                        |              | (5,7.14)        | (3,27.3) | (14,28)   | (16,20.7) | (16,35.5) |

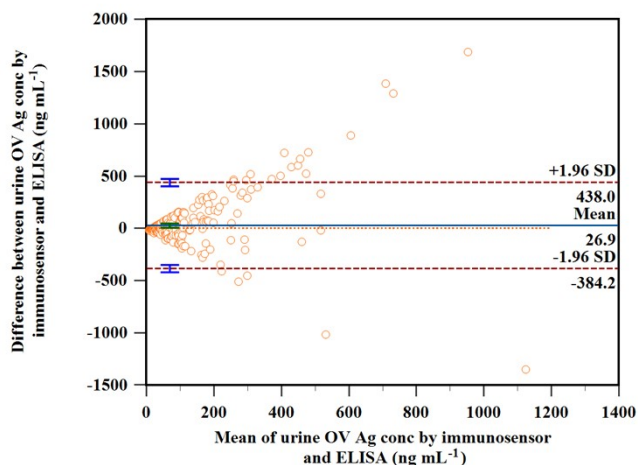

Figure S3 The Bland-Altman plot for concordance analysis between the electrochemical immunosensor and conventional ELISA techniques. The solid line illustrates the mean of absolute difference between the methods. The dashed line 95% limit of agreement (n = 400).

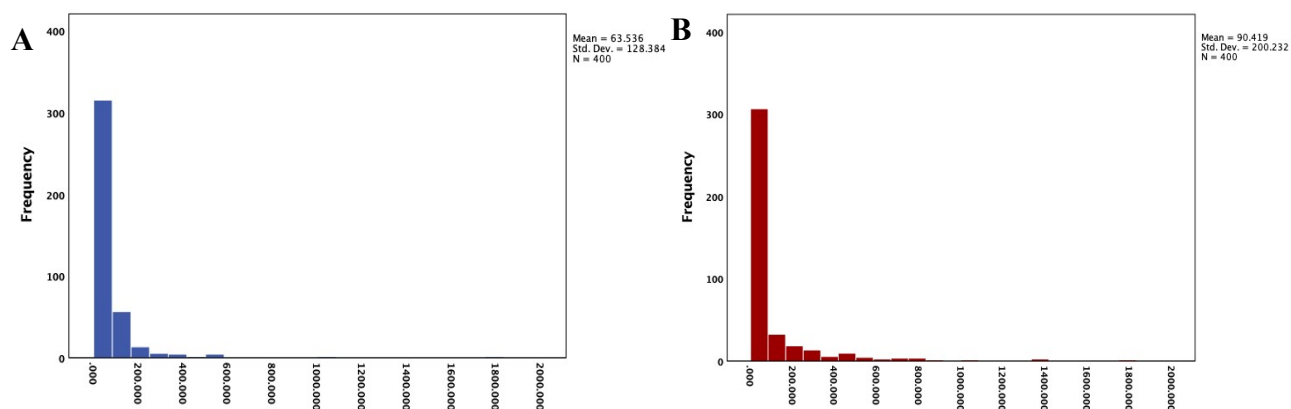

Figure S3 Frequency distribution of urine OV Ag concentration measured by (A) ELISA and (B) immunosensor
